# Supplementary material
Source: PubMed Central journal article supplement (PMC8756478)
Supplement: sj-pdf-1-jcb-10.1177_0271678X211020589.pdf [file sj-pdf-1-jcb-10.1177_0271678X211020589.pdf]

## SUPPLEMENTARY MATERIAL

**Supplementary figure S1:** Theoretical estimation of the temporal signal-to-noise ratio (tSNR) as a function of measurement time for ASL and BOLD.

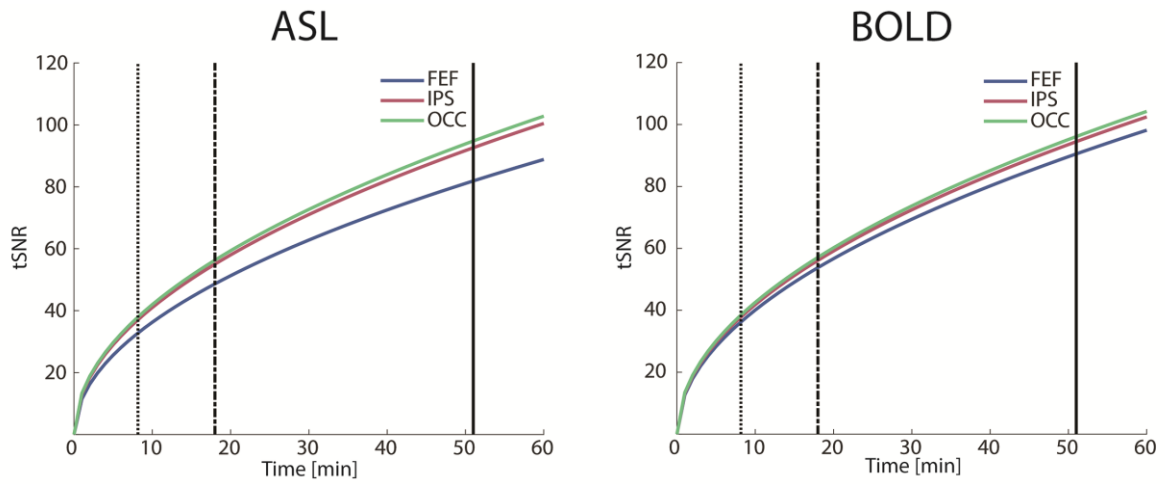

The tSNR was estimated as  $(\bar{x}/sd) \cdot \sqrt{t} / \sqrt{t_{\text{modality}}}$  with  $\bar{x}$  being the mean and sd the standard deviation of the time course and  $t$  representing the measurement time (0-60 min).  $t_{\text{modality}}$  represents the actual measurement time used in this study for each modality as indicated by the vertical lines (dotted: BOLD, dash-dotted: ASL, solid: fPET). Measuring ASL and BOLD imaging for the same duration as fPET (i.e. 52 min) would improve the tSNR by approximately 70% and 150%, respectively. FEF: frontal eye field, IPS: intraparietal sulcus, OCC: occipital cortex.

**Supplementary Table 1: Reliability of CMRGlu at rest and task.**

|               | CoV (IQR) [%] |             |             | ICC <sub>3,1</sub> |      |      | DICE        |
|---------------|---------------|-------------|-------------|--------------------|------|------|-------------|
|               | FEF           | IPS         | OCC         | FEF                | IPS  | OCC  | Whole brain |
| <b>CMRGlu</b> |               |             |             |                    |      |      |             |
| Rest          | 7.0 (11.1)    | 7.1 (10.0)  | 7.9 (8.1)   | 0.68               | 0.74 | 0.72 | -           |
| Easy vs Rest  | 29.3 (46.1)   | 24.4 (30.6) | 27.0 (50.3) | 0.44               | 0.53 | 0.31 | 0.52        |
| Hard vs Rest  | 26.4 (30.3)   | 17.4 (23.3) | 21.4 (16.2) | 0.41               | 0.61 | 0.51 | 0.61        |

Reliability of CMRGlu was mostly comparable to  $K_i$  with the best performance at rest and a similar drop at task. Interestingly, the DICE coefficient is almost identical between  $K_i$  and CMRGlu indicating similar activation maps.

**Supplementary table 2:** Reliability of  $K_i$  when calculating task-specific changes independent of BOLD data.

|                         | CoV (IQR) [%] |             |             | ICC <sub>3,1</sub> |      |      | DICE        |
|-------------------------|---------------|-------------|-------------|--------------------|------|------|-------------|
|                         | FEF           | IPS         | OCC         | FEF                | IPS  | OCC  | Whole brain |
| <b><math>K_i</math></b> |               |             |             |                    |      |      |             |
| Rest                    | 5.3 (3.6)     | 5.0 (2.3)   | 4.9 (3.7)   | 0.88               | 0.89 | 0.86 | -           |
| Easy vs Rest            | 23.5 (34.9)   | 30.0 (60.5) | 43.5 (33.8) | 0.64               | 0.58 | 0.32 | 0.52        |
| Hard vs Rest            | 25.6 (16.0)   | 13.6 (26.8) | 16.0 (32.5) | 0.73               | 0.78 | 0.69 | 0.58        |

The baseline term of the fPET analysis was modeled by a third-order polynomial as described previously.<sup>1</sup> The approach showed similar test-retest reliability with slightly higher ICC values for the FEF but also higher variability (CoV) in the OCC.

## References

1. Hahn A, Gryglewski G, Nics L, et al. Quantification of Task-Specific Glucose Metabolism with Constant Infusion of 18F-FDG. *J Nucl Med* 2016; 57: 1933–1940.
